# Supplementary material for: Sparse connectivity enables efficient information processing in cortex-like artificial neural networks
Source: Front Neural Circuits. 2025 Mar 13;19:1528309. doi: 10.3389/fncir.2025.1528309 (PMC11966417; doi:10.3389/fncir.2025.1528309)
Supplement: Supplementary file 1 [file Table_1.xlsx]

## Sheet: Sheet1
	0.01	0.02	0.03	0.04	0.05	0.06	0.07	0.08	0.09	0.10	0.20	0.30	0.40	0.50	0.60	0.70	0.80	0.90	1.00
100	44.568	47.187	50.699	53.534	56.09	55.77	58.394	59.788	61.021	60.035	63.861	66.656	68.478	71.97	72.397	74.09	74.059	76.321	76.911
200	48.551	51.48	58.064	60.198	62.829	63.958	65.293	65.189	64.776	66.047	66.977	73.082	76.474	80.404	81.806	82.976	83.761	83.107	84.361
300	51.111	58.073	62.177	64.883	66.948	67.622	68.917	69.449	69.343	69.196	75.591	80.08	83.133	85.413	85.097	85.964	83.584	85.535	84.146
400	51.208	58.184	63.433	67.417	70.466	70.682	71.862	72.275	71.965	72.22	81.381	85.467	86.787	86.292	87.129	88.174	87.176	87.3	83.816
500	54.432	61.429	67.004	70.67	71.259	72.726	72.539	74.434	75.787	74.335	84.771	86.733	88.067	88.034	86.009	87.868	85.075	87.976	87.01
600	55.002	63.677	68.935	71.868	72.759	72.502	73.714	74.145	76.752	80.253	86.717	88.133	88.031	89.066	87.428	87.904	86.931	85.89	83.109
700	53.489	63.299	70.351	72.216	73.156	74.116	74.304	76.933	78.827	81.389	87.499	88.795	89.453	88.598	87.354	87.691	86.07	86.638	86.733
800	55.752	64.569	70.423	74.74	76.229	76.392	77.165	79.745	82.089	83.21	88.153	88.661	88.744	88.343	87.336	88.068	85.83	86.623	82.732
900	56.631	66.83	72.007	74.603	76.58	78.206	80.352	81.942	83.707	84.801	88.903	89.162	90.113	89.429	88.119	86.542	86.211	87.11	85.312
1000	55.728	67.541	73.331	75.618	76.416	78.376	81.51	82.928	83.546	84.952	88.775	88.782	87.174	88.986	86.043	87.731	88.102	85.283	85.618
2000	64.286	75.214	78.964	83.723	86.345	87.607	88.261	88.371	89.271	88.855	89.855	90.233	89.904	89.145	88.948	87.56	85.597	84.922	84.209
3000	69.084	76.525	81.944	85.945	88.802	89.226	89.319	89.447	89.789	89.707	90.074	89.237	88.021	85.751	86.07	86.681	83.976	85.793	83.538
4000	73.947	80.532	84.589	87.17	88.345	89.607	89.403	90.208	90.269	90.604	89.475	89.637	88.128	87.324	86.961	86.545	84.944	79.933	85.322
5000	76.29	83.751	88.148	88.912	90.35	90.558	90.941	90.666	90.269	91.082	90.999	89.658	87.638	86.423	86.296	86.458	84.688	83.422	79.164
6000	76.462	84.867	87.914	89.22	89.561	90.405	90.892	90.36	90.95	90.184	89.863	87.917	89.013	86.417	85.61	84.217	82.619	79.811	80.782
7000	77.877	85.791	88.763	89.819	90.556	90.487	91.216	91.082	90.765	90.038	90.374	87.331	88.617	88.582	87.413	86.856	83.989	82.563	79.747
8000	80.272	87.164	89.32	89.975	90.711	91.069	90.94	91.08	90.67	90.774	89.327	88.812	85.484	87.851	86.015	83.247	83.638	83.119	80.867
9000	80.763	87.031	89.263	91.179	90.645	90.241	89.602	90.624	89.942	89.42	90.187	86.559	84.871	87.797	83.902	79.676	84.372	85.202	78.464
10000	80.928	87.869	89.559	90.138	90.499	91.103	90.292	90.628	89.334	90.798	88.363	89.528	86.529	85.683	85.701	81.438	83.166	82.945	80.272
11000	82.025	89.176	90.182	90.842	90.436	90.495	91.098	91.146	91.181	90.979	90.018	89.75	86.137	83.401	87.583	86.348	84.846	79.321	81.548
12000	84.141	88.87	90.049	90.015	90.682	90.682	90.862	90.793	90.616	90.343	90.102	87.867	88.984	84.913	83.029	83.639	83.66	78.165	78.595
13000	85.051	88.791	89.752	90.287	90.463	92.104	91.343	91.665	90.443	90.514	89.738	89.115	87.827	84.468	85.407	82.032	83.673	82.568	80.603
14000	85.33	89.408	90.884	90.491	90.237	91.175	90.997	91.084	90.296	90.73	88.211	87.989	88.131	86.775	86.055	82.296	78.575	79.864	73.576
15000	87.314	89.509	90.769	91.111	91.132	91.378	91.157	90.35	91.415	91.051	90.235	88.459	88.431	86.026	84.432	81.241	77.053	80.21	78.33
16000	86.339	89.265	91.153	90.64	90.569	91.139	90.896	90.423	89.304	90.415	88.918	86.973	86.3	86.479	82.843	81.423	82.214	76.33	78.883
17000	87.237	90.121	90.27	91.136	91.024	90.542	91.161	90.359	90.244	91.141	89.354	89.574	85.512	84.473	82.366	80.618	82.501	76.651	77.536
18000	87.501	90.619	90.788	90.558	91.047	91.215	91.152	90.389	90.954	90.315	90.251	88.081	88.36	86.293	82.99	83.556	80.285	76.778	77.825
19000	87.106	89.534	91.006	90.719	90.304	90.402	91.015	91.14	90.634	90.647	89.281	87.58	85.456	86.085	84.725	80.647	81.685	77.83	69.77
20000	88.322	89.686	90.503	91.333	91.01	89.77	91.209	90.876	90.761	90.308	89.987	87.479	86.118	83.221	82.566	78.976	75.947	79.66	77.491
21000	88.756	89.862	90.972	90.498	90.893	90.331	89.669	89.418	90.173	91.038	90.13	88.848	85.355	88.763	80.466	79.219	79.707	72.954	79.624
22000	88.501	90.67	90.722	90.594	90.668	91.428	91.316	89.567	90.625	90.049	89.235	86.531	86.399	82.863	83.246	81.862	82.476	75.661	76.317
23000	88.446	90.296	90.267	90.719	90.592	90.749	90.986	90.478	89.26	90.051	90.181	86.422	85.224	83.13	81.592	80.505	79.524	79.012	71.065
24000	88.871	90.995	90.672	91.593	90.533	91.789	91.504	90.09	89.963	89.685	89.226	88.2	88.204	87.166	83.174	78.867	77.861	77.661	77.23
26000	89.458	90.979	91.295	91.246	91.636	91.052	90.6	90.749	89.684	90.657	89.289	87.654	87.006	86.91	85.904	82.596	83.032	79.598	77.385
28000	88.867	91.219	91.353	90.736	91.158	90.898	90.497	89.818	90.074	90.604	89.122	87.96	84.873	85.51	82.024	78.31	70.261	77.717	76.047
30000	89.566	90.701	90.987	90.149	91.315	90.188	90.469	90.081	89.91	90.163	89.191	86.134	85.47	85.731	83.522	81.645	81.195	79.343	75.919
32000	89.543	91.017	91.342	90.114	91.403	91.041	90.227	90.488	90.496	89.909	88.308	85.552	84.107	83.978	81.129	84.868	76.55	77.159	72.782
34000	89.746	91.076	91.843	91.113	90.459	90.935	91.118	90.132	91.131	90.918	88.654	85.468	84.997	86.124	83.183	80.409	80.069	76.464	66.382
36000	90.2	90.579	90.991	91.212	90.486	90.336	89.37	90.926	90.177	89.403	86.992	86.557	88.615	84.294	84.238	84.111	79.401	76.584	74.394
38000	89.678	90.665	90.451	91.203	91.388	90.347	89.162	90.57	90.037	90.767	90.085	87.745	86.864	83.861	81.598	81.385	77.227	73.741	76.054
