# Supplementary material for: Sparse connectivity enables efficient information processing in cortex-like artificial neural networks
Source: Front Neural Circuits. 2025 Mar 13;19:1528309. doi: 10.3389/fncir.2025.1528309 (PMC11966417; doi:10.3389/fncir.2025.1528309)
Supplement: Supplementary file 2 [file Table_2.xlsx]

## Sheet: Sheet1
	0.01	0.02	0.03	0.04	0.05	0.06	0.07	0.08	0.09	0.10	0.20	0.30	0.40	0.50	0.60	0.70	0.80	0.90	1.00
100	23.62	23.88	23.986	24.176	24.45	24.74	25.07	25.447	25.861	26.044	28.52	29.898	30.451	30.554	30.973	30.641	30.682	30.299	30.757
200	24.047	24.444	25.026	25.644	26.426	27.133	27.495	27.822	27.973	28.1	30.279	31.148	31.595	30.919	31.38	30.969	30.931	30.981	30.219
300	24.284	24.932	26.016	26.692	27.409	27.728	28.136	28.502	28.781	29.055	31.027	32.048	31.608	31.739	30.569	30.745	29.991	30.364	30.179
400	24.675	25.782	26.908	27.396	27.786	28.138	28.582	28.995	29.488	29.805	31.591	31.142	31.137	31.019	30.705	29.987	28.846	29.489	29.233
500	24.989	26.113	27.31	27.761	28.207	28.607	29.146	29.473	29.766	30.393	31.325	31.283	30.734	30.671	29.623	30.256	28.629	28.894	29.727
600	24.82	26.373	27.497	27.77	28.377	28.71	29.384	29.968	30.417	30.582	31.445	30.835	31.176	30.612	29.683	29.111	29.207	29.236	29.147
700	25.198	26.753	27.734	28.113	28.638	29.307	29.843	29.904	30.583	30.638	31.026	30.299	30.932	30.011	29.712	29.937	29.495	28.877	26.735
800	25.257	27.101	27.778	28.197	28.794	29.39	29.656	29.973	30.498	30.849	31.326	29.88	30.107	30.015	29.769	29.23	29.469	29.058	28.948
900	25.522	27.414	28.187	28.528	29.082	29.886	30.033	30.32	30.443	30.43	31.033	30.338	29.625	29.293	29.631	28.974	29.067	28.677	28.377
1000	25.357	26.853	27.556	28.455	29.49	30.496	30.533	31.086	30.738	30.966	30.352	30.568	30.06	29.801	29.611	29.131	29.058	28.853	29.047
2000	26.597	28.108	28.719	29.535	29.278	30.062	29.789	30.257	29.956	30.72	29.647	29.63	29.691	29.594	29.344	28.888	28.444	27.844	28.271
3000	27.573	28.653	29.373	29.926	30.304	30.551	30.623	30.386	30.646	29.979	30.25	29.367	29.319	28.771	28.645	28.383	27.654	28.003	28.563
4000	27.69	28.847	29.483	29.799	29.506	29.968	29.5	30.218	30.456	30.152	29.65	28.912	28.787	28.264	27.908	27.384	28.426	28.047	28.079
5000	28.038	28.835	29.722	30.314	29.613	29.767	30.398	30.049	30.457	30.556	29.51	29.173	28.849	28.108	28.116	27.281	27.6	28.453	27.379
6000	27.368	28.063	29.326	29.165	29.189	29.386	29.477	29.592	29.483	30.09	29.643	29.233	28.94	28.754	28.633	28.967	28.636	27.877	27.666
7000	28.107	29.09	29.521	29.867	30.255	30.028	30.285	29.453	29.834	28.866	29.941	28.947	28.715	29.284	28.834	29.975	29.361	27.543	25.265
8000	27.709	28.218	28.615	29.157	28.973	29.756	29.186	29.268	29.413	29.579	29.988	29.265	28.088	28.438	29.02	28.779	26.008	22.814	22.345
9000	27.962	28.83	29.299	29.646	29.828	29.973	29.639	29.864	30.188	30.083	29.171	29.245	28.284	28.34	27.895	27.54	26.315	24.963	22.62
10000	27.604	29.056	29.081	29.745	29.449	30.163	29.793	29.357	30.111	30.215	29.338	27.782	28.374	29.764	29.208	24.882	22.22	17.43	22.649
11000	27.373	28.316	29.376	29.557	29.851	29.694	29.99	29.803	29.244	29.344	28.556	28.37	29.189	29.526	27.717	25.379	22.369	20.064	24.059
12000	27.947	29.245	29.44	29.803	29.878	29.876	30.443	28.591	28.869	29.478	29.37	29.496	29.383	27.848	25.69	22.64	20.413	20.556	21.885
13000	27.731	28.71	29.881	29.742	30.02	29.733	30.094	29.767	29.931	29.39	28.895	28.954	28.692	29.554	24.094	21.144	22.123	20.909	16.052
14000	27.989	29.089	29.675	29.129	29.867	29.903	29.615	29.56	29.689	30.105	29.745	29.599	29.422	25.97	22.79	20.138	20.426	19.825	20.515
15000	28.15	28.975	29.555	29.873	29.748	30.332	30.122	30.079	29.828	29.436	29.495	29.402	28.743	23.299	21.789	22.25	23.117	22.448	19.445
16000	27.926	28.774	29.322	29.024	29.94	29.551	29.818	29.179	29.397	30.074	29.116	29.203	29.259	23.524	22.097	24.342	19.94	20.749	21.244
17000	27.663	29.061	29.55	29.882	30.258	30.235	29.373	30.29	28.97	29.647	28.446	29.319	28.409	24.415	24.796	24.753	23.421	22.706	20.688
18000	27.988	28.701	29.105	29.981	29.288	29.365	29.268	29.739	29.368	29.557	28.919	29.361	26.589	23.611	24.215	22.291	20.747	21.602	19.517
19000	27.89	29.561	29.714	29.538	29.903	29.548	29.57	29.744	29.516	29.116	28.964	29.785	27.625	23.546	24.337	21.258	22.789	22.132	19.979
20000	27.919	29.366	29.64	29.689	30.018	30.23	29.802	30.215	29.61	29.698	29.199	29.836	25.016	25.09	24.39	19.585	19.143	19.944	17.433
21000	28.108	29.399	29.826	30.333	29.744	30.45	30.007	29.878	29.458	29.971	29.318	29.707	22.339	23.946	23.918	20.499	21.36	19.591	20.155
22000	27.885	28.899	29.63	29.718	28.961	30.079	29.697	29.371	29.4	30.315	30.007	29.483	23.359	25.224	24.058	21.013	19.8	19.797	19.766
23000	27.838	28.967	29.304	29.212	29.47	29.177	29.539	29.57	29.376	30.038	29.938	29.179	23.193	24.058	22.83	21.676	19.934	18.996	19.831
24000	28.128	28.925	29.588	28.952	29.278	29.921	28.951	30.078	28.573	29.993	29.812	28.762	25.736	25.109	22.5	21.613	20.253	19.745	18.501
26000	27.37	29.177	29.795	29.664	29.812	28.991	29.795	29.261	29.928	29.528	30.459	26.097	24.575	22.012	20.669	18.494	20.062	20.06	12.725
28000	28	29.05	28.747	29.189	30.013	29.596	29.094	30.128	29.713	30.2	29.666	22.665	23.03	22.374	21.518	19.379	20.088	13.537	13.09
30000	28.092	29.276	29.697	29.927	29.725	30.021	29.845	29.486	29.892	29.669	30.458	23.916	24.704	23.639	19.967	21.8	18.366	16.025	9.999
32000	27.466	28.673	29.379	29.652	29.231	29.332	28.662	29.312	29.179	28.729	28.699	25.079	23.189	19.714	21.794	18.082	13.853	11.004	10.028
34000	27.909	29.061	28.97	29.564	28.839	29.124	29.318	28.79	29.247	28.781	29.25	24.707	25.372	21.862	19.288	19.379	16.789	10.638	9.782
36000	28.145	28.822	29.154	29.33	28.974	29.377	29.126	29.903	29.812	29.643	26.24	24.409	21.679	23.311	19.224	16.62	11.026	11.278	10
38000	27.848	29.157	29.643	29.84	29.554	29.942	29.524	30.034	29.742	30.074	24.041	21.863	23.313	21.038	18.726	13.126	9.913	9.999	10
