# Supplementary material for: Sparse connectivity enables efficient information processing in cortex-like artificial neural networks
Source: Front Neural Circuits. 2025 Mar 13;19:1528309. doi: 10.3389/fncir.2025.1528309 (PMC11966417; doi:10.3389/fncir.2025.1528309)
Supplement: Supplementary file 3 [file Table_3.xlsx]

## Sheet: Sheet1
	0.01	0.02	0.03	0.04	0.05	0.06	0.07	0.08	0.09	0.10	0.20	0.30	0.40	0.50	0.60	0.70	0.80	0.90	1.00
100	48.4602	48.7683	49.2659	50.3073	51.7717	53.0175	53.3226	52.921	54.203	53.2261	53.4989	51.6589	50.598	51.0939	51.0617	50.6926	50.688	51.0021	50.8101
200	49.0487	50.9994	53.2951	53.4145	54.7691	54.5058	54.0757	53.6639	54.0684	53.3491	51.3432	51.0764	50.5424	51.2977	50.4681	51.3781	50.8579	50.4494	51.2401
300	49.716	54.2662	54.8879	54.8981	54.1391	53.4085	53.7349	53.3632	52.9396	52.5132	50.8145	51.8625	51.6457	51.3344	50.5795	50.5702	50.0476	48.321	50.4822
400	51.4037	55.1198	55.4829	54.1676	54.3087	55.7938	53.2999	53.0562	53.4826	52.2746	52.1581	51.6077	50.9076	50.7782	51.4779	51.4721	50.2812	50.0939	50.2543
500	52.68	55.0087	55.9139	54.9865	54.7606	53.9513	52.6387	51.7903	52.1713	52.7918	51.0528	50.7867	51.6395	51.3589	50.6551	51.4653	49.6219	50.6876	50.5906
600	53.3807	54.5264	55.1252	53.5726	53.6414	52.6764	53.1181	52.1973	52.2649	48.313	51.6334	50.3601	51.0488	50.8783	51.4338	51.3456	51.0091	50.2345	50.1218
700	53.7906	55.6386	53.8142	54.6422	53.2163	52.7313	51.7443	51.6788	51.2948	51.7616	51.8939	50.2518	51.6839	51.6201	51.3453	50.2657	51.7098	51.1115	50.0994
800	54.2383	55.9127	54.7581	52.4416	53.1595	53.1102	51.758	51.5352	52.804	51.4837	50.1736	50.5454	50.8942	49.9762	49.7756	49.7856	50.9294	50.4278	50.6651
900	55.0125	56.3852	54.3272	54.292	53.0784	52.27	52.5211	51.8721	51.9731	51.6904	51.8517	50.5338	51.4323	50.5003	50.5518	51.9608	50.4951	50.5513	49.4056
1000	54.7665	54.1245	54.4244	52.7672	51.9579	51.7354	52.3453	51.9135	50.9817	53.2287	50.8494	51.3315	51.5812	51.1171	51.0986	50.3422	49.7739	49.9936	48.8078
2000	55.1547	54.1072	53.1204	52.1617	51.157	52.4115	51.5345	52.4606	51.2735	52.3289	52.2106	50.8057	50.4481	50.2708	49.8621	48.718	50.2842	47.2842	50.0159
3000	56.23	52.0905	52.2422	52.9894	51.468	51.7363	50.2094	52.3166	52.9338	50.907	50.0305	50.064	51.2503	51.182	50.7347	50.5132	48.2045	50.6161	49.9141
4000	54.887	53.8246	52.4177	52.3147	51.1717	51.5464	52.5098	52.8896	51.5881	50.3146	50.7853	51.6988	50.9767	51.198	49.5103	50.6431	49.5536	49.9886	48.7836
5000	54.7985	51.2881	52.0123	51.8645	52.0811	52.1112	51.4637	51.5271	51.9291	52.3176	52.1315	50.7353	51.9003	50.2775	49.8212	49.3971	45.02	36.8484	32.3348
6000	53.5763	52.9799	50.7056	52.6639	52.2152	51.2939	51.7976	52.7273	51.04	52.0302	52.1652	50.8111	51.2914	51.185	50.5449	44.9953	40.5132	29.0803	21.3048
7000	53.7868	51.3843	52.4477	51.1761	50.7184	51.7469	51.5317	50.5136	50.8557	51.3419	51.4233	51.6711	51.2387	49.3838	40.3125	18.0467	17.6281	17.6281	10.2747
8000	54.3425	53.5645	52.1312	50.3168	50.5421	51.5564	51.2393	50.2339	51.6034	51.5903	51.2759	51.0253	49.6998	48.5397	25.7582	13.9514	10.2747	10.2747	10.2747
9000	54.5747	52.661	51.9556	52.2807	52.2267	52.1836	51.7029	51.1011	52.5376	51.6725	51.5359	52.0378	51.6133	41.6883	28.6581	10.2747	10.2747	10.2747	10.2747
10000	55.0983	53.1989	51.815	52.5179	51.7815	51.5172	52.1575	51.8396	52.234	51.6267	51.6937	50.5796	49.123	28.6581	10.2747	10.2747	10.2747	10.2747	10.2747
11000	54.9948	51.8335	52.7297	51.6103	51.9227	50.8995	50.8372	51.8136	50.0476	51.1567	50.7438	51.7153	37.0323	18.1095	10.2747	10.2747	10.2747	10.2747	10.2747
12000	54.9074	50.0423	51.3803	51.9034	52.5625	52.6043	50.9608	52.0613	51.3965	51.5741	50.8499	48.1896	25.259	10.2747	10.2747	10.2747	10.2747	10.2747	10.2747
13000	54.3128	51.5906	52.2154	51.5584	50.8913	51.2861	50.0604	51.677	50.9841	49.4631	51.9434	50.2408	29.802	14.8987	10.2747	10.2747	10.2747	10.2747	10.2747
14000	54.6582	52.8237	50.46	51.0552	50.0807	51.297	51.9849	51.1237	50.2519	52.1348	52.1219	44.9768	17.6281	10.2747	10.2747	10.2747	10.2747	10.2747	10.2747
15000	54.2759	51.5984	51.4282	52.7763	51.6079	52.7857	51.761	51.0754	52.1814	52.4147	51.1685	45.5523	17.6281	10.2747	10.2747	10.2747	10.2747	10.2747	10.2747
16000	53.5343	53.0525	52.4087	50.0641	50.7951	50.6422	50.5345	51.4316	51.1661	49.7045	51.6002	28.9338	10.2747	10.2747	10.2747	10.2747	10.2747	10.2747	10.2747
17000	54.1275	51.2318	51.0489	51.5336	53.3187	48.543	52.0551	52.4062	48.4303	51.702	51.9958	37.5448	17.6281	10.2747	10.2747	10.2747	10.2747	10.2747	10.2747
18000	55.0053	52.4317	53.3086	51.7683	51.9445	51.9733	51.0987	51.0191	51.3445	52.3522	52.5563	21.7784	13.9514	10.2747	10.2747	10.2747	10.2747	10.2747	10.2747
19000	52.9844	51.4099	50.68	51.2075	50.8753	50.7586	50.5116	51.1851	51.7749	50.8615	50.7063	25.3045	10.2747	10.2747	10.2747	10.2747	10.2747	10.2747	10.2747
20000	54.1651	52.4468	52.3472	50.5496	52.2394	51.1631	49.7507	51.4067	51.715	50.6792	50.7928	15.0768	10.2747	10.2747	10.2747	10.2747	10.2747	10.2747	10.2747
22000	54.6799	51.6934	51.9714	51.7141	50.5553	52.2386	51.778	51.5197	51.4985	52.5918	49.3103	10.2747	10.2747	10.2747	10.2747	10.2747	10.2747	10.2747	10.2747
24000	54.1194	52.7376	51.4692	51.5458	51.2874	52.2782	51.573	50.622	51.0278	51.7419	33.4297	10.2747	10.2747	10.2747	10.2747	10.2747	10.2747	10.2747	10.2747
26000	53.3764	51.5812	52.2244	51.3523	51.7648	51.5614	52.338	51.3841	50.1368	51.0658	29.3076	10.2747	10.2747	10.2747	10.2747	10.2747	10.2747	10.2747	10.2747
28000	55.0236	53.1163	50.8718	52.3148	49.9387	52.0066	51.6031	51.5601	51.3453	50.4313	17.6281	10.2747	10.2747	10.2747	10.2747	10.2747	10.2747	10.2747	10.2747
30000	52.9689	51.7179	52.0491	51.9882	51.3503	50.821	51.4592	51.6564	51.6516	53.0664	10.2747	10.2747	10.2747	10.2747	10.2747	10.2747	10.2747	10.2747	10.2747
32000	54.0094	51.8523	52.4224	51.6903	52.2629	48.9523	51.0321	51.2871	50.9633	51.1598	10.2747	10.2747	10.2747	10.2747	10.2747	10.2747	10.2747	10.2747	10.2747
34000	53.1959	51.9873	52.8314	52.0414	51.8248	50.3654	51.8716	51.2168	51.8235	52.358	10.2747	10.2747	10.2747	10.2747	10.2747	10.2747	10.2747	10.2747	10.2747
36000	53.9436	53.1118	51.7016	50.7536	52.5568	51.0146	50.2103	52.4268	51.6644	52.3165	10.2747	10.2747	10.2747	10.2747	10.2747	10.2747	10.2747	10.2747	10.2747
38000	53.398	51.8519	51.9429	51.6694	51.074	50.1299	50.8919	49.8471	49.2881	48.8523	10.2747	10.2747	10.2747	10.2747	10.2747	10.2747	10.2747	10.2747	10.2747
